# Supplementary material for: A rhodamine embedded bio-compatible smart molecule mimicking a combinatorial logic circuit and ‘key-pad lock’ memory device for defending against information risk
Source: Royal Society of Chemistry journal article supplement (doi:10.1039/c5nj02579f), 2015-10-23
Supplement: c5nj02579f1.pdf [file c5nj02579f1.pdf]

# Rhodamine Embedded bio-compatible Smart Molecule Mimicking Combinatorial Logic Circuit and 'Key-pad Lock' memory device for defending information risk.

Tarun Mistri<sup>a</sup>, Rabiul Alam<sup>a</sup>, Rahul Bhowmick<sup>a</sup>, Atul Katarkar<sup>b</sup>, Keya Chaudhuri<sup>b</sup> and Mahammad Ali<sup>\*a</sup>

<sup>a</sup>Department of Chemistry, Jadavpur University, Kolkata 700 032, India, Fax: 91-33-2414-6223, E-mail: [m\\_ali2062@yahoo.com](mailto:m_ali2062@yahoo.com),

<sup>b</sup>Molecular & Human Genetics Division, CSIR-Indian Institute of Chemical Biology, 4 Raja S.C. Mullick Road, Kolkata-700032, India

## Supporting Information for Publication

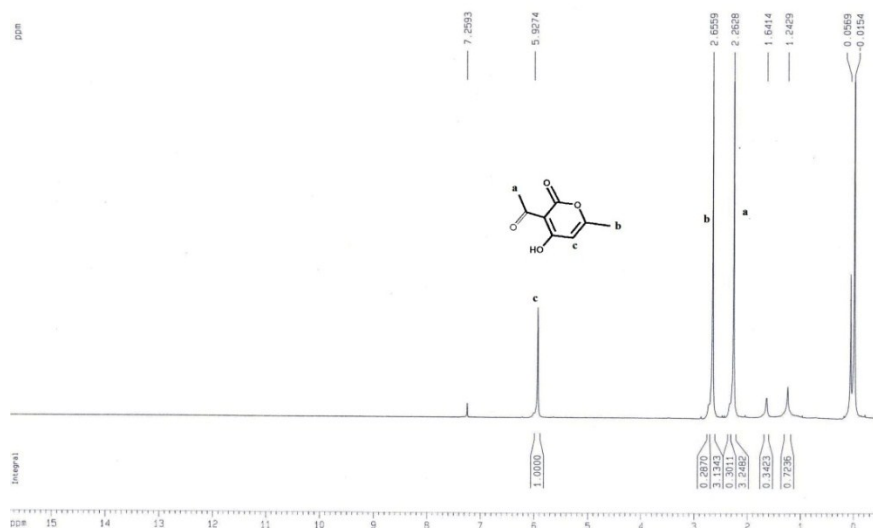

Fig S1. <sup>1</sup>H NMR spectrum of L<sup>B</sup> in CDCl<sub>3</sub>.

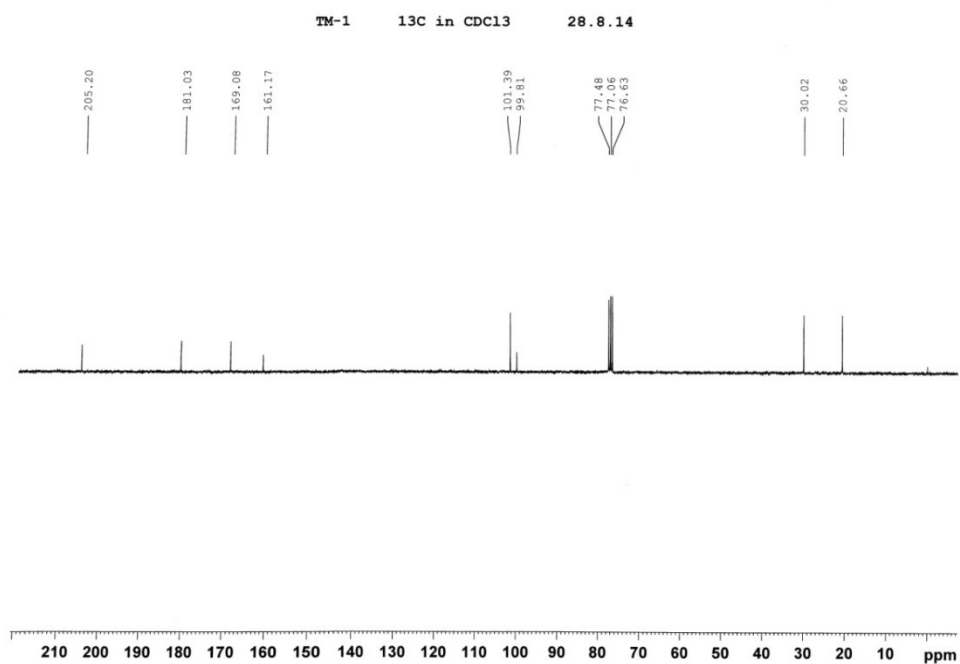

Fig S2.  $^{13}\text{C}$  NMR spectrum of  $\text{L}^{\text{B}}$  in  $\text{CDCl}_3$ .

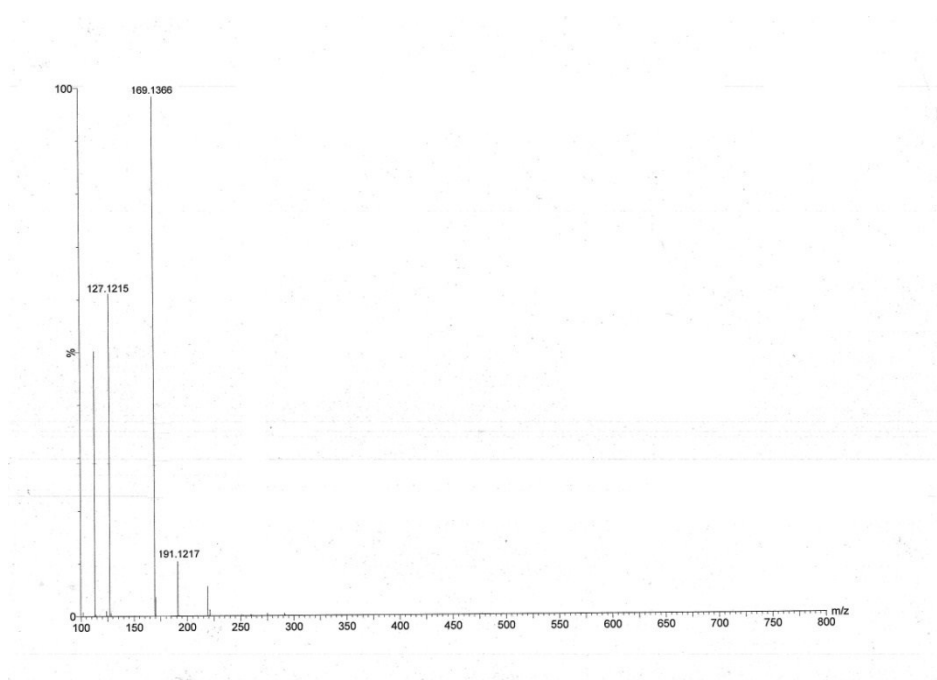

Fig S3. Mass spectrum of  $\text{L}^{\text{B}}$  ( $\text{C}_8\text{H}_8\text{O}_4 + \text{H}^+$ ).

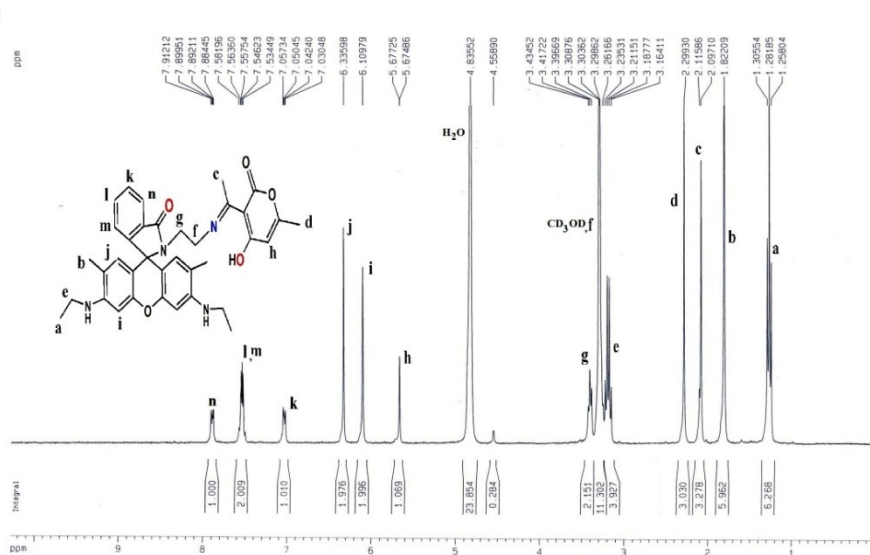

**Fig S4 (A).** <sup>1</sup>H NMR spectrum of **L<sup>c</sup>** in CD<sub>3</sub>OD.

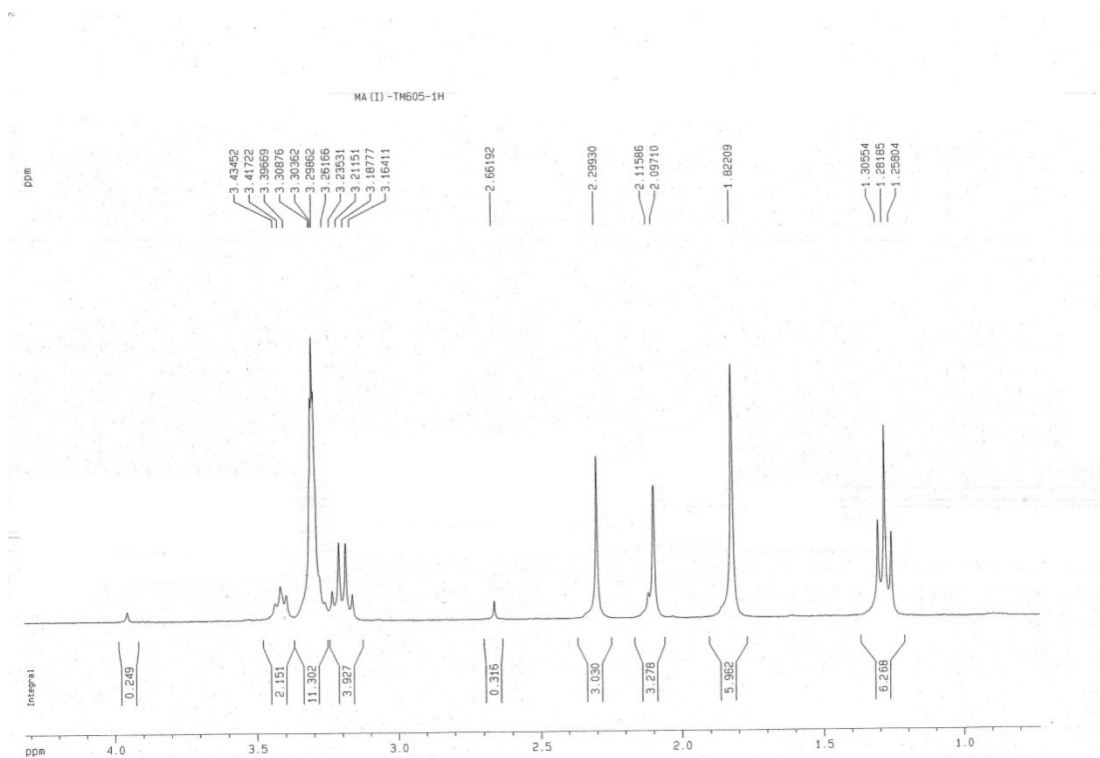

**Fig S4(B).** <sup>1</sup>H NMR spectrum of **L<sup>c</sup>** in CD<sub>3</sub>OD (Illustrating mainly aliphatic proton)

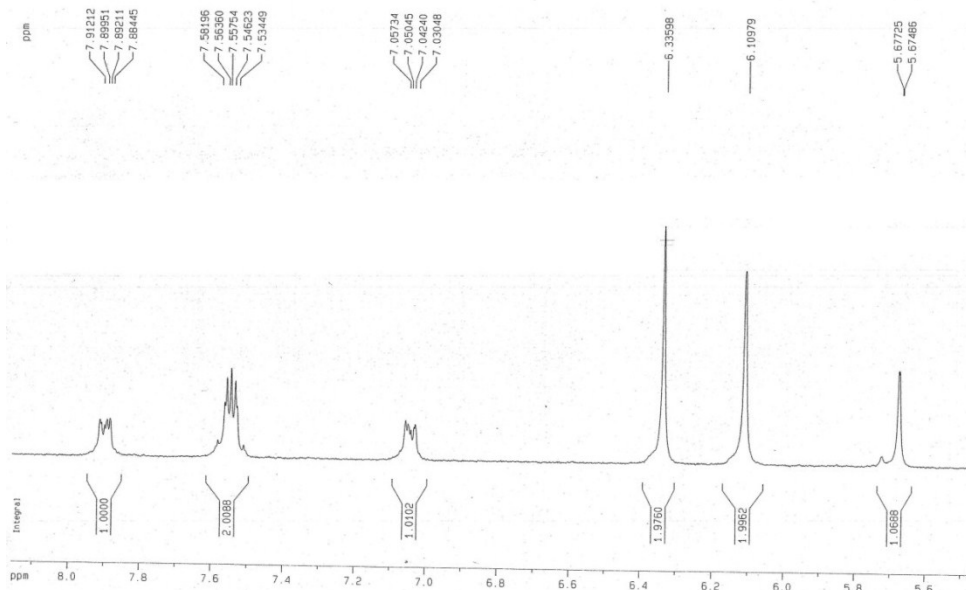

Fig. S4(C).  $^1\text{H}$  NMR spectrum of  $\text{L}^c$  in  $\text{CD}_3\text{OD}$  (Illustrating mainly aromatic proton).

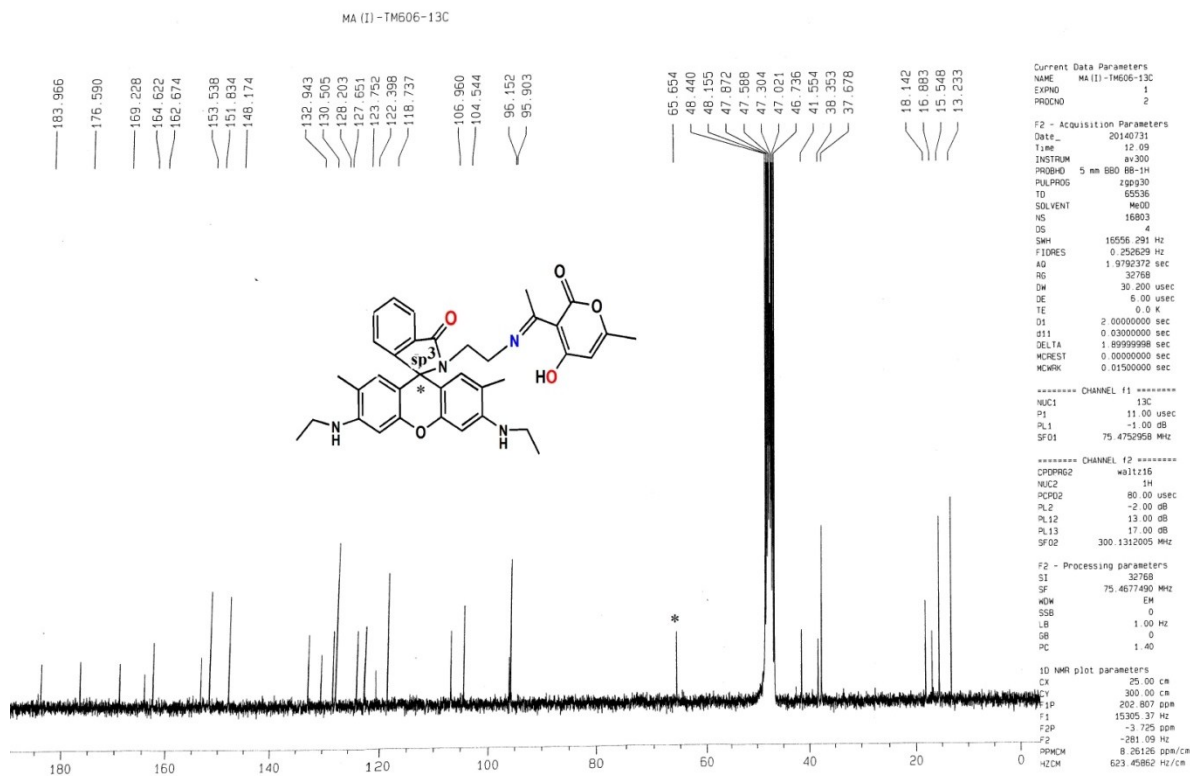

Fig. S5.  $^{13}\text{C}$ -NMR spectra of  $\text{L}^c$  in  $\text{DMSO}$  ( $d_6$ )

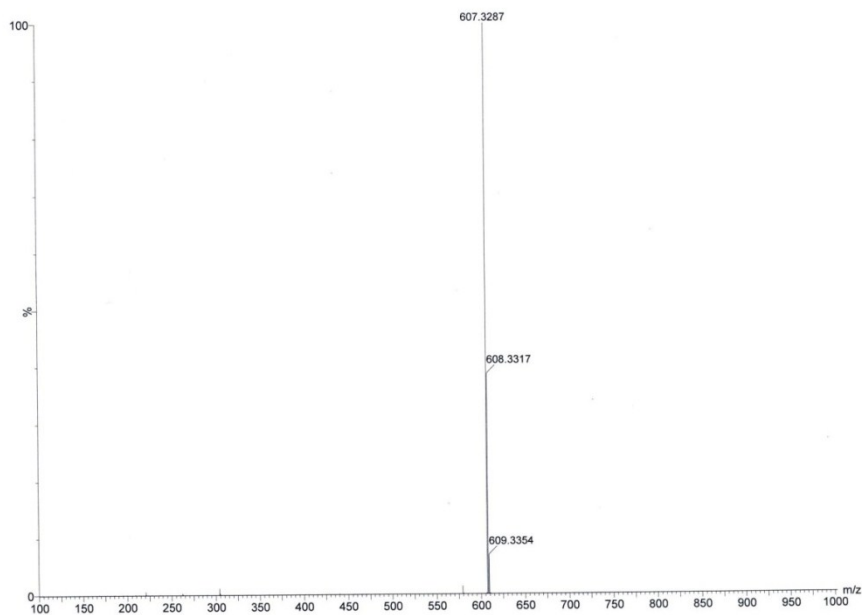

Fig S6. Mass Spectra of  $L^C$  ( $C_{36}H_{38}N_4O_5+H^+$ ).

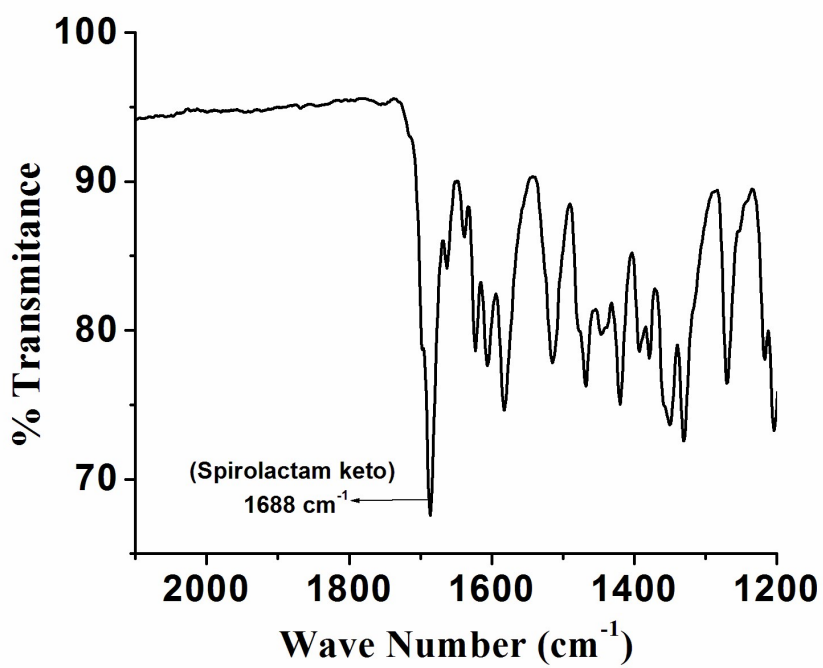

Fig. S7. IR spectrum of  $L^C$ .

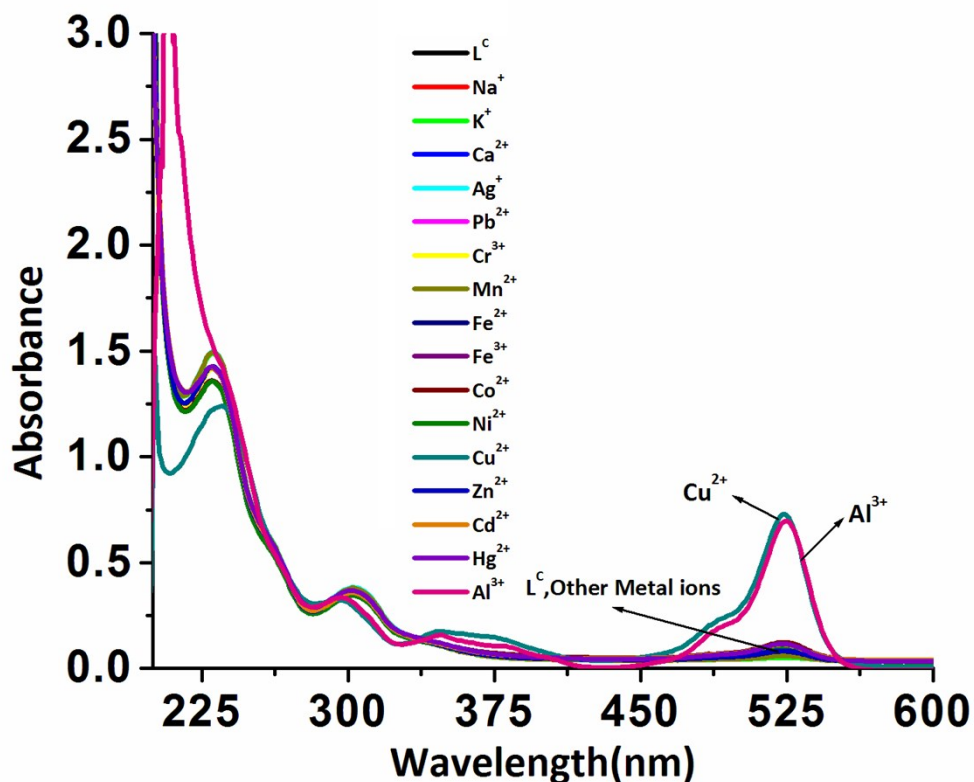

**Fig. S8.** UV-Vis spectral studies of selective binding of  $L^C$  (20  $\mu$ M) toward  $Al^{3+}$  over other metal ions in HEPES buffer at pH 7.0 in  $H_2O$ -MeOH = 3:7 (v/v) at 25  $^{\circ}C$

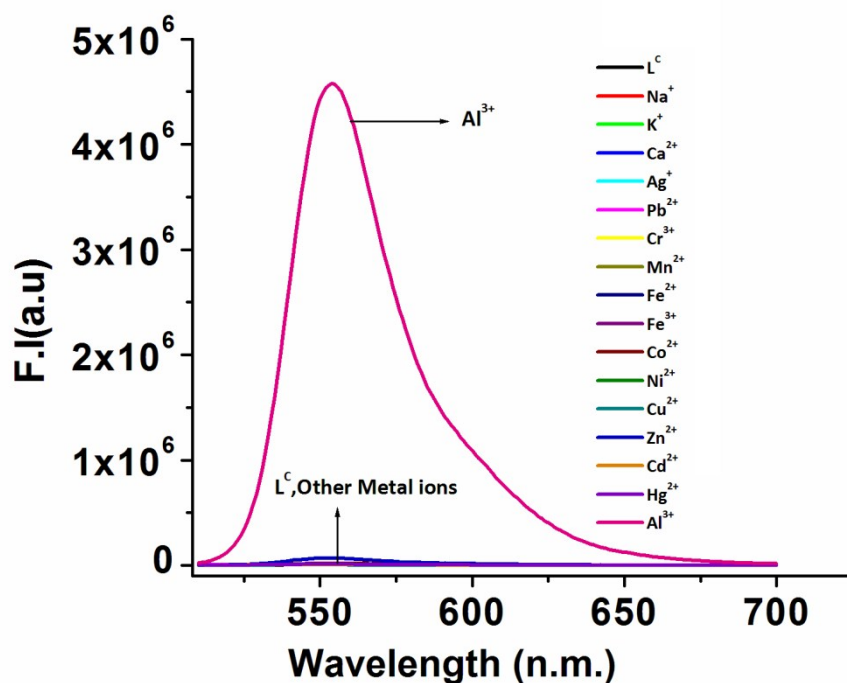

**Fig. S9.** Fluorescence studies of selective binding of  $L^C$  (10  $\mu$ M) toward  $Al^{3+}$  over other metal ions in HEPES buffer at pH 7.0 in  $H_2O$ -MeOH = 3:7 (v/v) at 25  $^{\circ}C$ .

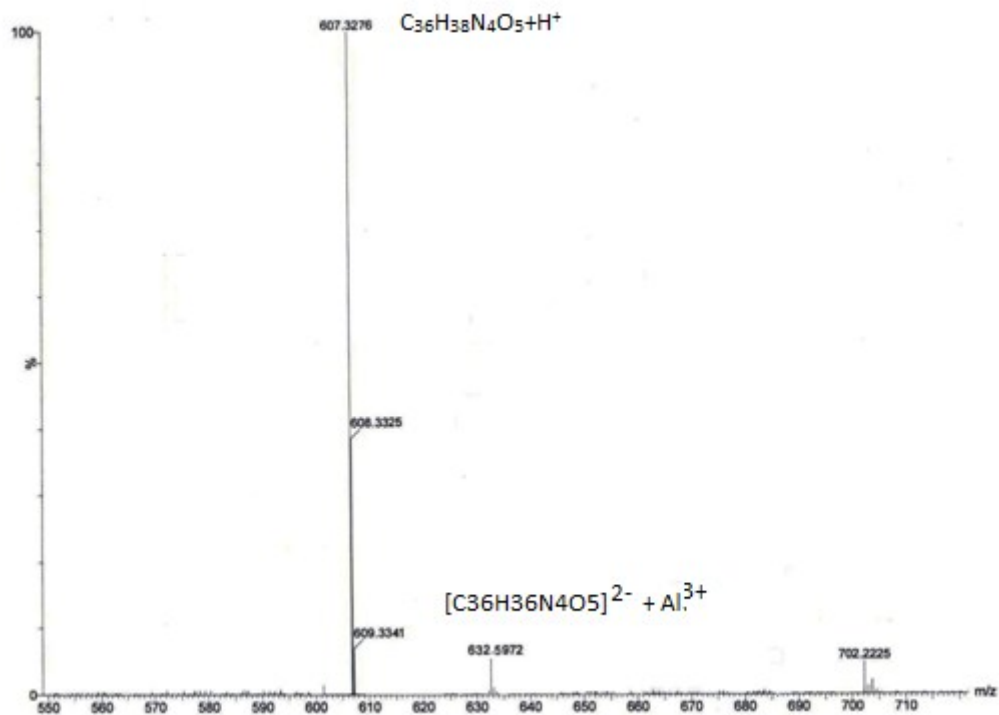

**Fig. S10.** Mass Spectra of Al-Complex of Receptor ( $L^c$ ) ( $C_{36}H_{38}N_4O_5+Al^{3+}$ )

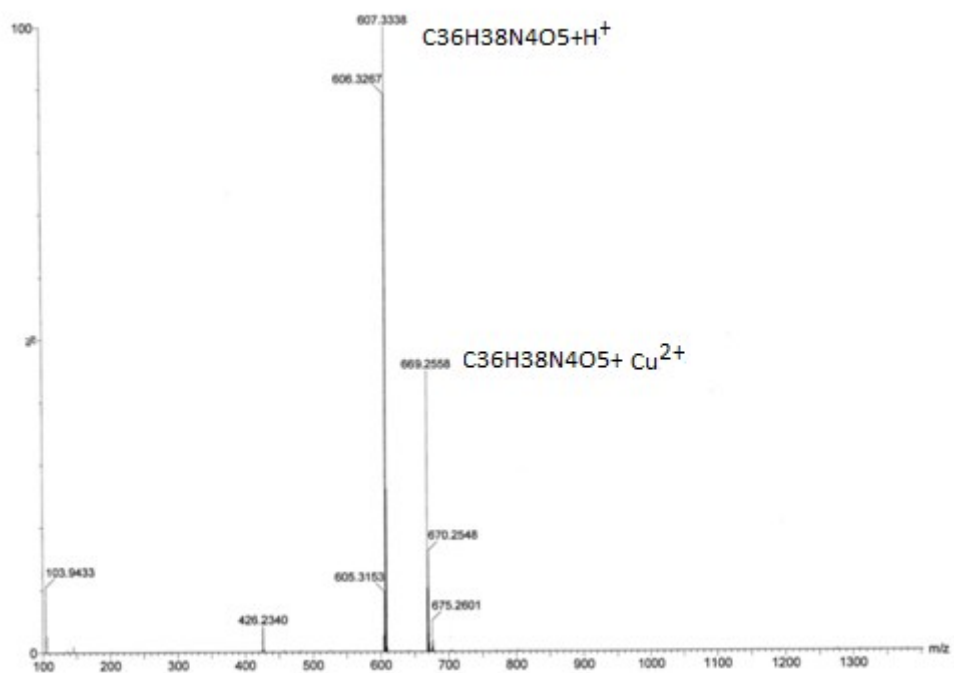

**Fig. S11.** Mass Spectra of Cu-Complex of Receptor ( $L^c$ ).

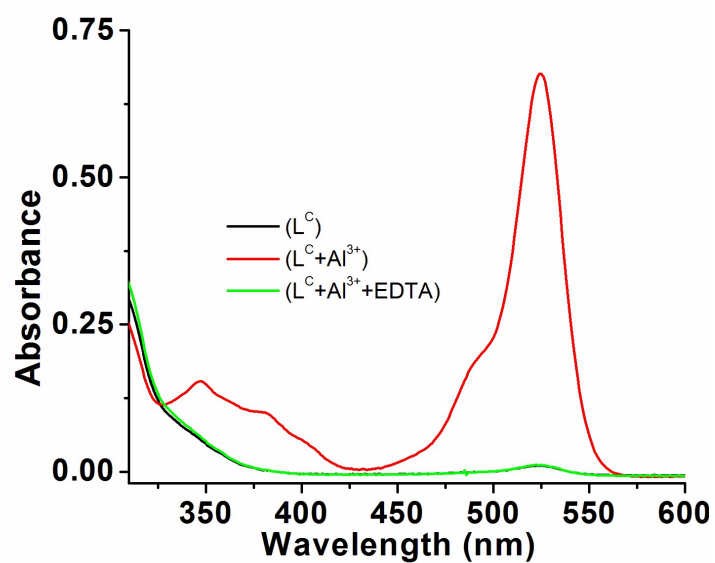

**Fig. S12 (A).** Change in absorption upon addition of EDTA to  $L^C - Al^{3+}$  complex in HEPES buffer at pH 7.0 in  $H_2O - MeOH = 3:7$  (v/v) at 25 °C.

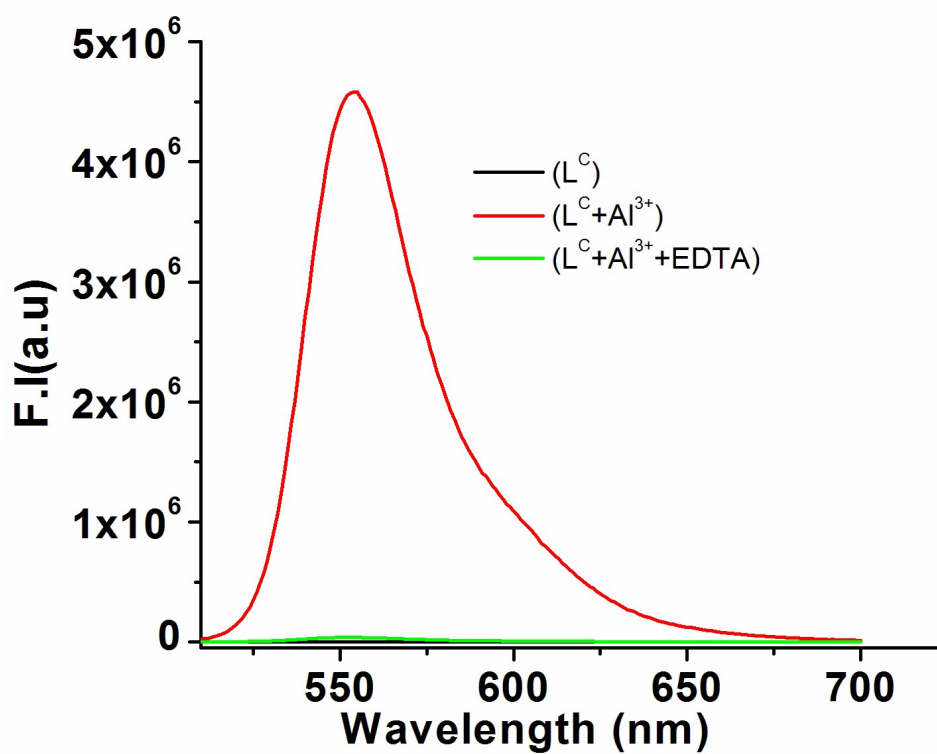

**Fig. S12 (B).** Change in emission upon addition of EDTA to  $L^C - Al^{3+}$  complex in HEPES buffer at pH 7.0 in  $H_2O - MeOH = 3:7$  (v/v) at 25 °C.



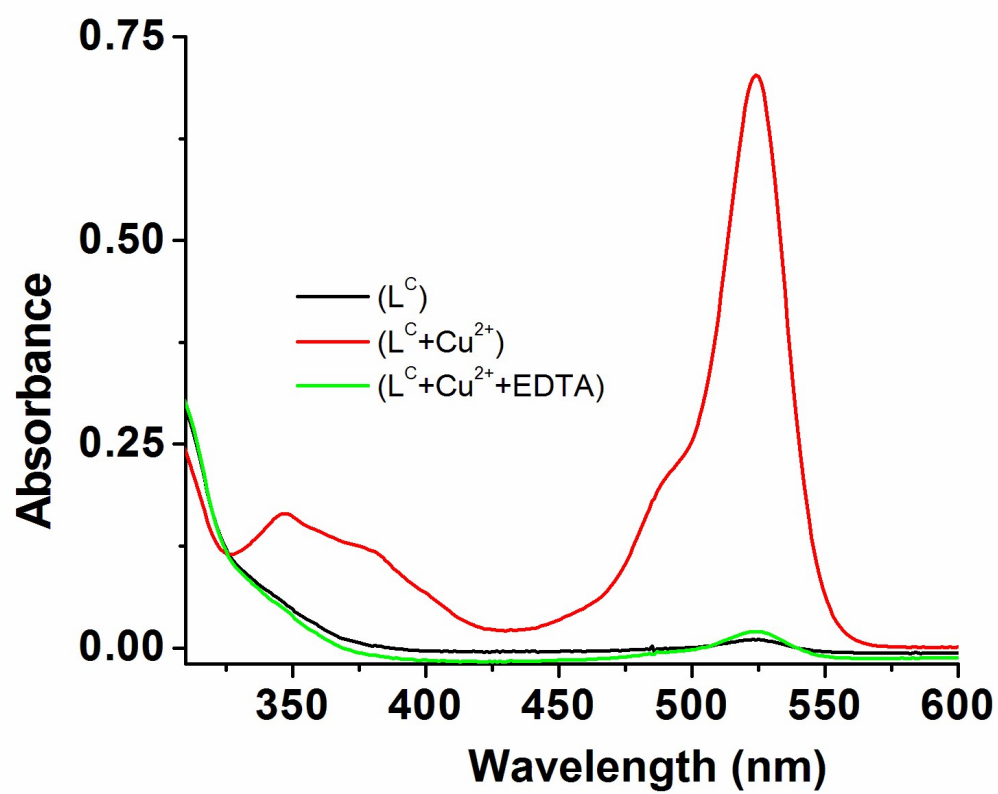

**Fig. S13.** Change in absorption upon addition of EDTA to  $L^C - Cu^{2+}$  complex in HEPES buffer at pH 7.0 in  $H_2O - MeOH = 3:7$  (v/v) at 25 °C.

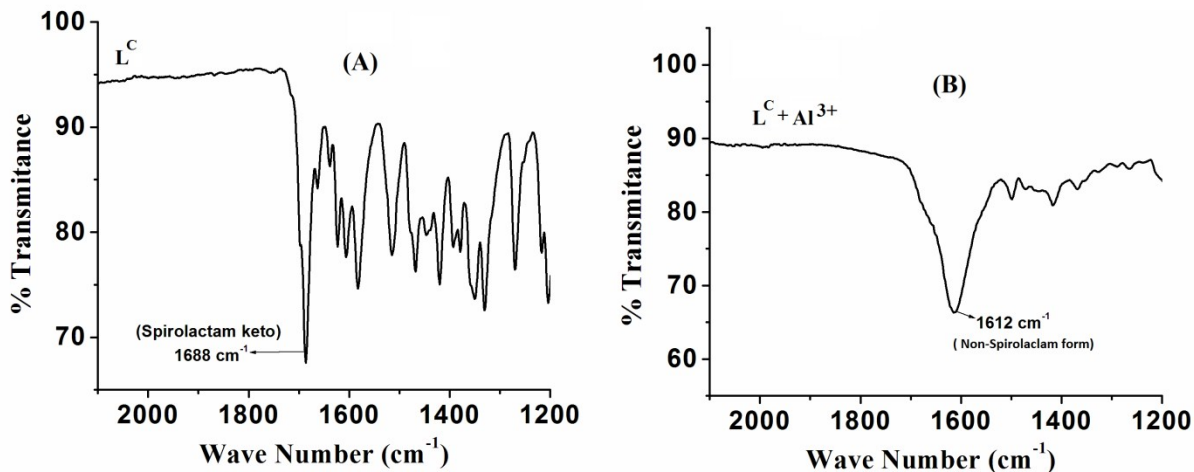

Fig. S14. Comparative IR spectra of  $L^C$  and complex ( $L^C+Al^{3+}$ ).

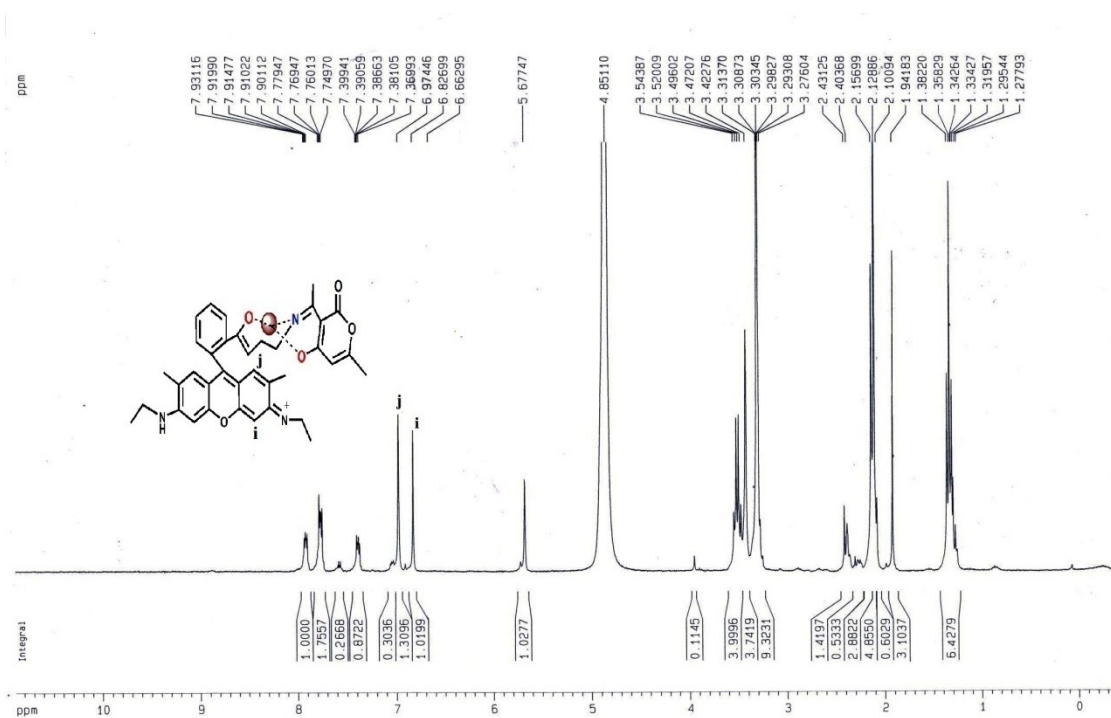

Fig. S15 (A).  $^1H$  NMR Studies of the  $L^C-Al^{3+}$  complex in  $CD_3OD$ .

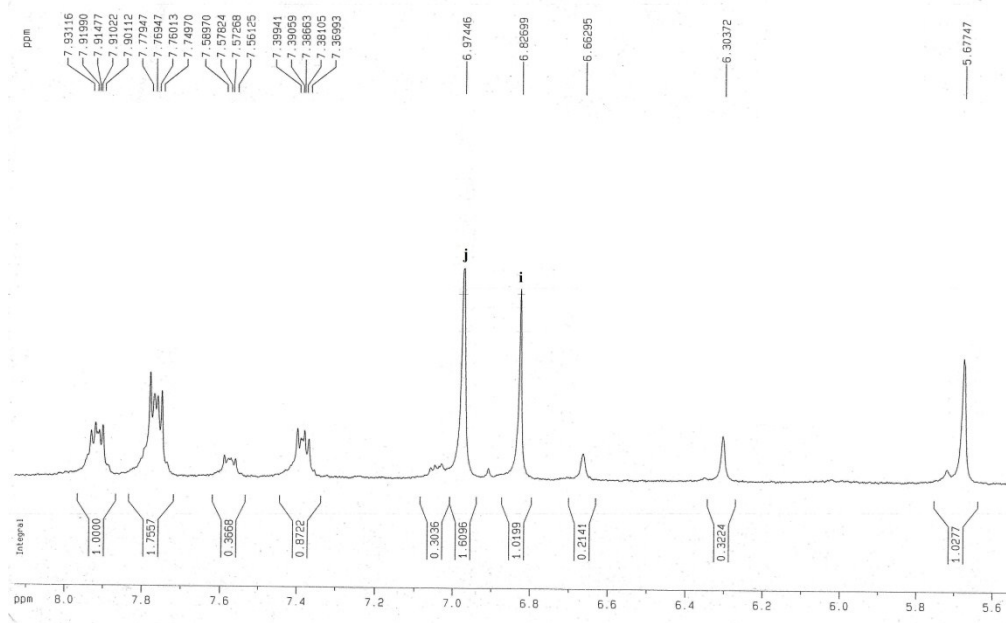

**Fig. S15 (B).**  $^1\text{H}$  NMR Studies of the  $\text{L}^{\text{C}}\text{-Al}^{3+}$  in  $\text{CD}_3\text{OD}$  (illustrating mainly aromatic protons).

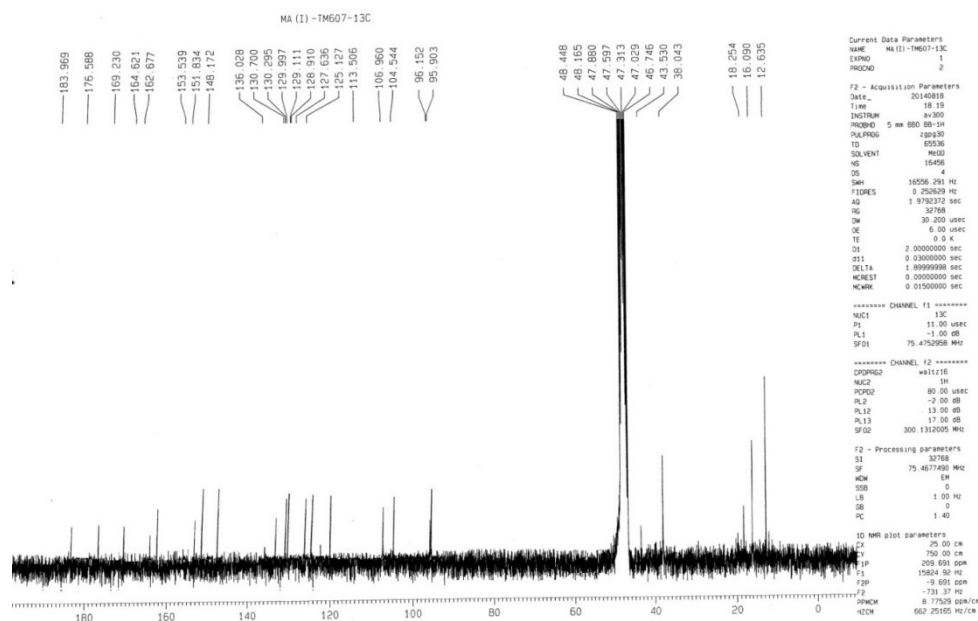

**Fig. S16.**  $^{13}\text{C}$ -NMR spectra of complex ( $\text{L}^{\text{C}}\text{-Al}^{3+}$ ) in  $\text{DMSO}(\text{d}_6)$ .

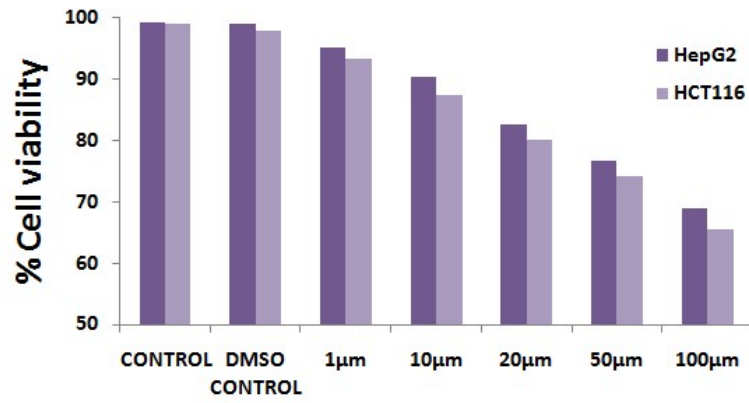

**Fig. S17.** (A) Depicts % cell viability of HepG2 and HCT116 cells treated with different concentrations (1  $\mu$ M-100  $\mu$ M) of  $L^c$  for 12 hours determined by MTT assay.
